# Supplementary material for: Fine Mapping and Candidate Gene Analysis of BnC08.cds, a Recessive Gene Responsible for Sepal-Specific Chlorophyll-Deficiency in Brassica napus L
Source: Front Plant Sci. 2022 Mar 10;13:850330. doi: 10.3389/fpls.2022.850330 (PMC8960310; doi:10.3389/fpls.2022.850330)
Supplement: Supplementary Additional File 1 — Go classification of DEGs between sepals of NY18 and df74. [file Table_1.XLSX]

## Sheet: Table S1
GO ID (level1)	GO Term (level1)	GO ID (level2)	GO Term (level2)	number_of_out (All)	Genes_of_out
GO:0008150	Biological Process	GO:0048511	rhythmic process	22	BnaA01g15820D,BnaA01g19880D,BnaA03g18840D,BnaA03g55000D,BnaA05g20100D,BnaA06g26980D,BnaA07g18900D,BnaA09g32650D,BnaA09g34590D,BnaA09g46770D,BnaC01g18910D,BnaC01g24700D,BnaC01g39760D,BnaC03g08310D,BnaC03g48210D,BnaC04g05320D,BnaC05g00840D,BnaC06g33780D,BnaC08g23490D,BnaC08g40840D,BnaC08g48660D,BnaCnng09450D
GO:0008150	Biological Process	GO:0040007	growth	70	BnaA01g12150D,BnaA01g26500D,BnaA01g30380D,BnaA01g36400D,BnaA02g04170D,BnaA02g12880D,BnaA03g03800D,BnaA03g21590D,BnaA03g35840D,BnaA03g38050D,BnaA03g58460D,BnaA04g23760D,BnaA05g00810D,BnaA05g10900D,BnaA05g17590D,BnaA05g26500D,BnaA05g33680D,BnaA05g34130D,BnaA06g12900D,BnaA07g15170D,BnaA07g19700D,BnaA07g20980D,BnaA08g05310D,BnaA08g13410D,BnaA08g24220D,BnaA09g02480D,BnaA09g08360D,BnaA09g55050D,BnaA10g…
GO:0008150	Biological Process	GO:0051704	multi-organism process	149	BnaA01g01830D,BnaA01g06610D,BnaA01g17540D,BnaA01g27300D,BnaA01g30380D,BnaA02g00540D,BnaA02g02290D,BnaA02g04170D,BnaA02g05290D,BnaA02g34610D,BnaA03g03800D,BnaA03g06060D,BnaA03g08850D,BnaA03g20050D,BnaA03g20300D,BnaA03g21590D,BnaA03g24080D,BnaA03g26130D,BnaA03g26140D,BnaA03g34290D,BnaA03g38630D,BnaA03g38920D,BnaA03g56550D,BnaA03g58460D,BnaA04g07210D,BnaA04g17910D,BnaA04g27040D,BnaA04g27260D,BnaA05g…
GO:0008150	Biological Process	GO:0040011	locomotion	7	BnaA03g06060D,BnaA03g38920D,BnaA10g03800D,BnaC03g07810D,BnaC03g45960D,BnaC05g03710D,BnaC08g00570D
GO:0008150	Biological Process	GO:0071840	cellular component organization or biogenesis	351	BnaA01g02440D,BnaA01g15820D,BnaA01g26320D,BnaA01g26500D,BnaA01g29470D,BnaA01g30380D,BnaA01g31480D,BnaA01g32580D,BnaA01g34810D,BnaA01g36400D,BnaA02g04170D,BnaA02g12880D,BnaA02g13590D,BnaA02g26670D,BnaA02g29640D,BnaA02g30620D,BnaA02g33340D,BnaA03g02030D,BnaA03g03180D,BnaA03g03800D,BnaA03g06160D,BnaA03g14740D,BnaA03g20240D,BnaA03g21590D,BnaA03g22710D,BnaA03g29100D,BnaA03g29340D,BnaA03g30180D,BnaA03g…
GO:0008150	Biological Process	GO:0098754	detoxification	6	BnaA02g05060D,BnaA03g56040D,BnaA09g09110D,BnaA10g14770D,BnaC03g10240D,BnaC09g37140D
GO:0008150	Biological Process	GO:0022414	reproductive process	146	BnaA01g01830D,BnaA01g05040D,BnaA01g30380D,BnaA01g34710D,BnaA02g00400D,BnaA02g04170D,BnaA02g05290D,BnaA02g12130D,BnaA02g30620D,BnaA03g02480D,BnaA03g03800D,BnaA03g06060D,BnaA03g06160D,BnaA03g19450D,BnaA03g21590D,BnaA03g24080D,BnaA03g38920D,BnaA03g53680D,BnaA03g53830D,BnaA03g58460D,BnaA04g07210D,BnaA04g12240D,BnaA04g27040D,BnaA04g27260D,BnaA05g00810D,BnaA05g10900D,BnaA05g17590D,BnaA05g20100D,BnaA05g…
GO:0008150	Biological Process	GO:0000003	reproduction	146	BnaA01g01830D,BnaA01g05040D,BnaA01g30380D,BnaA01g34710D,BnaA02g00400D,BnaA02g04170D,BnaA02g05290D,BnaA02g12130D,BnaA02g30620D,BnaA03g02480D,BnaA03g03800D,BnaA03g06060D,BnaA03g06160D,BnaA03g19450D,BnaA03g21590D,BnaA03g24080D,BnaA03g38920D,BnaA03g53680D,BnaA03g53830D,BnaA03g58460D,BnaA04g07210D,BnaA04g12240D,BnaA04g27040D,BnaA04g27260D,BnaA05g00810D,BnaA05g10900D,BnaA05g17590D,BnaA05g20100D,BnaA05g…
GO:0008150	Biological Process	GO:0044699	single-organism process	1090	BnaA01g00670D,BnaA01g00790D,BnaA01g01120D,BnaA01g01830D,BnaA01g02440D,BnaA01g02880D,BnaA01g05040D,BnaA01g05240D,BnaA01g06610D,BnaA01g08120D,BnaA01g08610D,BnaA01g09520D,BnaA01g10530D,BnaA01g11840D,BnaA01g12150D,BnaA01g13640D,BnaA01g15640D,BnaA01g15820D,BnaA01g16670D,BnaA01g20890D,BnaA01g22700D,BnaA01g23160D,BnaA01g24440D,BnaA01g26500D,BnaA01g27890D,BnaA01g28110D,BnaA01g30380D,BnaA01g31470D,BnaA01g…
GO:0008150	Biological Process	GO:0050896	response to stimulus	577	BnaA01g00670D,BnaA01g00790D,BnaA01g02430D,BnaA01g03580D,BnaA01g06610D,BnaA01g09520D,BnaA01g12020D,BnaA01g12870D,BnaA01g16670D,BnaA01g17540D,BnaA01g22700D,BnaA01g23160D,BnaA01g24440D,BnaA01g26500D,BnaA01g27300D,BnaA01g30380D,BnaA01g30570D,BnaA01g30920D,BnaA01g31080D,BnaA01g32900D,BnaA01g34550D,BnaA02g00310D,BnaA02g00540D,BnaA02g00740D,BnaA02g02030D,BnaA02g02290D,BnaA02g02560D,BnaA02g04730D,BnaA02g…
GO:0008150	Biological Process	GO:0002376	immune system process	30	BnaA01g17540D,BnaA02g05290D,BnaA02g34610D,BnaA03g38630D,BnaA03g56550D,BnaA05g03420D,BnaA05g30680D,BnaA05g33810D,BnaA06g23560D,BnaA07g01850D,BnaA08g19620D,BnaA09g25290D,BnaA09g55050D,BnaA10g00800D,BnaC01g01800D,BnaC01g25860D,BnaC03g18310D,BnaC03g45470D,BnaC04g56750D,BnaC05g45140D,BnaC05g46580D,BnaC06g00640D,BnaC07g48010D,BnaC08g33050D,BnaC08g33310D,BnaC08g43170D,BnaCnng29680D,BnaCnng68320D,BnaCnng…
GO:0008150	Biological Process	GO:0032501	multicellular organismal process	247	BnaA01g01120D,BnaA01g01830D,BnaA01g05040D,BnaA01g08610D,BnaA01g24440D,BnaA01g26500D,BnaA01g30380D,BnaA01g34710D,BnaA01g34730D,BnaA02g00400D,BnaA02g04170D,BnaA02g05290D,BnaA02g05410D,BnaA02g12130D,BnaA02g12880D,BnaA02g17180D,BnaA02g26940D,BnaA02g30620D,BnaA03g02480D,BnaA03g03800D,BnaA03g06060D,BnaA03g13340D,BnaA03g15610D,BnaA03g19450D,BnaA03g21590D,BnaA03g24080D,BnaA03g28700D,BnaA03g35180D,BnaA03g…
GO:0008150	Biological Process	GO:0032502	developmental process	262	BnaA01g00670D,BnaA01g01120D,BnaA01g01830D,BnaA01g05040D,BnaA01g08610D,BnaA01g12150D,BnaA01g24440D,BnaA01g26500D,BnaA01g30380D,BnaA01g34710D,BnaA01g34730D,BnaA02g00400D,BnaA02g04170D,BnaA02g05290D,BnaA02g05410D,BnaA02g12130D,BnaA02g12880D,BnaA02g17180D,BnaA02g26940D,BnaA02g30620D,BnaA03g02480D,BnaA03g03800D,BnaA03g06060D,BnaA03g13340D,BnaA03g15610D,BnaA03g19450D,BnaA03g21590D,BnaA03g28700D,BnaA03g…
GO:0008150	Biological Process	GO:0023052	signaling	180	BnaA01g09520D,BnaA01g16670D,BnaA01g22700D,BnaA01g30380D,BnaA01g34550D,BnaA02g00540D,BnaA02g02030D,BnaA02g02560D,BnaA02g12880D,BnaA02g14880D,BnaA02g23290D,BnaA02g26940D,BnaA02g34610D,BnaA03g02290D,BnaA03g02480D,BnaA03g10160D,BnaA03g19030D,BnaA03g21570D,BnaA03g30620D,BnaA03g33930D,BnaA03g34290D,BnaA03g36950D,BnaA03g40160D,BnaA03g43410D,BnaA03g43770D,BnaA03g43790D,BnaA03g56720D,BnaA04g05850D,BnaA04g…
GO:0008150	Biological Process	GO:0022610	biological adhesion	1	BnaC08g11680D
GO:0008150	Biological Process	GO:0008152	metabolic process	1287	BnaA01g00360D,BnaA01g00670D,BnaA01g00790D,BnaA01g01120D,BnaA01g01750D,BnaA01g01830D,BnaA01g02150D,BnaA01g02230D,BnaA01g02440D,BnaA01g02880D,BnaA01g05040D,BnaA01g06610D,BnaA01g08120D,BnaA01g08610D,BnaA01g09520D,BnaA01g10530D,BnaA01g11840D,BnaA01g12150D,BnaA01g14130D,BnaA01g15080D,BnaA01g15090D,BnaA01g15640D,BnaA01g17540D,BnaA01g17940D,BnaA01g18530D,BnaA01g19470D,BnaA01g19860D,BnaA01g19880D,BnaA01g…
GO:0008150	Biological Process	GO:0048518	positive regulation of biological process	88	BnaA01g05040D,BnaA01g19880D,BnaA01g24440D,BnaA02g04730D,BnaA02g05060D,BnaA02g20430D,BnaA02g34610D,BnaA03g18840D,BnaA03g34290D,BnaA03g36810D,BnaA03g43820D,BnaA03g50870D,BnaA03g56040D,BnaA04g06200D,BnaA04g26060D,BnaA04g29310D,BnaA05g10480D,BnaA05g10900D,BnaA05g22150D,BnaA06g00340D,BnaA06g09160D,BnaA06g12900D,BnaA06g15800D,BnaA06g23080D,BnaA07g00340D,BnaA07g24790D,BnaA07g28890D,BnaA08g03150D,BnaA08g…
GO:0008150	Biological Process	GO:0048519	negative regulation of biological process	53	BnaA02g05290D,BnaA02g23290D,BnaA03g02480D,BnaA03g53680D,BnaA05g20040D,BnaA05g21020D,BnaA05g30680D,BnaA05g33810D,BnaA06g26990D,BnaA06g39930D,BnaA07g35640D,BnaA08g02020D,BnaA08g23990D,BnaA09g25290D,BnaA09g26040D,BnaA09g46610D,BnaA09g48180D,BnaA10g00800D,BnaAnng02750D,BnaAnng23990D,BnaC01g38160D,BnaC01g39760D,BnaC02g04270D,BnaC02g28720D,BnaC03g04600D,BnaC03g18310D,BnaC03g48230D,BnaC03g61720D,BnaC04g…
GO:0008150	Biological Process	GO:0050789	regulation of biological process	496	BnaA01g00360D,BnaA01g00670D,BnaA01g01120D,BnaA01g01830D,BnaA01g02150D,BnaA01g05040D,BnaA01g08610D,BnaA01g09520D,BnaA01g11840D,BnaA01g16670D,BnaA01g19860D,BnaA01g19880D,BnaA01g22700D,BnaA01g24440D,BnaA01g28350D,BnaA01g28710D,BnaA01g30380D,BnaA01g30920D,BnaA01g31080D,BnaA01g34550D,BnaA01g37390D,BnaA02g00540D,BnaA02g00740D,BnaA02g02030D,BnaA02g02560D,BnaA02g02970D,BnaA02g04170D,BnaA02g04730D,BnaA02g…
GO:0008150	Biological Process	GO:0051179	localization	238	BnaA01g05040D,BnaA01g16840D,BnaA01g27890D,BnaA01g33910D,BnaA02g12590D,BnaA02g13590D,BnaA02g18150D,BnaA02g20090D,BnaA02g26600D,BnaA02g26940D,BnaA02g29650D,BnaA02g33340D,BnaA02g34610D,BnaA02g35410D,BnaA02g35930D,BnaA03g05850D,BnaA03g37560D,BnaA03g39490D,BnaA03g56990D,BnaA03g58510D,BnaA04g00710D,BnaA04g11790D,BnaA04g16290D,BnaA04g16580D,BnaA04g18610D,BnaA05g06110D,BnaA05g12390D,BnaA05g20580D,BnaA05g…
GO:0008150	Biological Process	GO:0065007	biological regulation	542	BnaA01g00360D,BnaA01g00670D,BnaA01g01120D,BnaA01g01830D,BnaA01g02150D,BnaA01g04530D,BnaA01g05040D,BnaA01g08610D,BnaA01g09520D,BnaA01g11840D,BnaA01g12020D,BnaA01g16670D,BnaA01g19860D,BnaA01g19880D,BnaA01g22700D,BnaA01g24440D,BnaA01g28350D,BnaA01g28710D,BnaA01g30380D,BnaA01g30920D,BnaA01g31080D,BnaA01g34550D,BnaA01g37390D,BnaA02g00540D,BnaA02g00740D,BnaA02g02030D,BnaA02g02560D,BnaA02g02970D,BnaA02g…
GO:0008150	Biological Process	GO:0001906	cell killing	3	BnaA03g08850D,BnaA07g32130D,BnaCnng65620D
GO:0008150	Biological Process	GO:0009987	cellular process	1426	BnaA01g00360D,BnaA01g00670D,BnaA01g00790D,BnaA01g01120D,BnaA01g01750D,BnaA01g01830D,BnaA01g02150D,BnaA01g02440D,BnaA01g02880D,BnaA01g05040D,BnaA01g05240D,BnaA01g06610D,BnaA01g08610D,BnaA01g09520D,BnaA01g10530D,BnaA01g11840D,BnaA01g12150D,BnaA01g13640D,BnaA01g15640D,BnaA01g15820D,BnaA01g16670D,BnaA01g19860D,BnaA01g19880D,BnaA01g20890D,BnaA01g22700D,BnaA01g23160D,BnaA01g24440D,BnaA01g26320D,BnaA01g…
GO:0003674	Molecular Function	GO:0098772	molecular function regulator	106	BnaA01g04370D,BnaA01g14010D,BnaA01g27890D,BnaA01g29470D,BnaA01g30570D,BnaA01g31480D,BnaA01g32580D,BnaA02g23290D,BnaA02g27900D,BnaA02g30620D,BnaA03g19030D,BnaA03g20050D,BnaA03g21590D,BnaA03g21600D,BnaA03g22710D,BnaA03g26250D,BnaA03g26790D,BnaA03g29100D,BnaA03g30250D,BnaA03g37500D,BnaA03g43410D,BnaA03g58510D,BnaA04g26890D,BnaA04g27250D,BnaA05g00320D,BnaA05g00800D,BnaA05g00810D,BnaA05g08410D,BnaA05g…
GO:0003674	Molecular Function	GO:0004871	signal transducer activity	61	BnaA01g05040D,BnaA01g22700D,BnaA02g02030D,BnaA02g07840D,BnaA02g14880D,BnaA02g34610D,BnaA03g43790D,BnaA04g22430D,BnaA05g03140D,BnaA05g05520D,BnaA05g13210D,BnaA05g16950D,BnaA05g33820D,BnaA06g05470D,BnaA06g14550D,BnaA06g22370D,BnaA06g34070D,BnaA06g34500D,BnaA06g40820D,BnaA07g04970D,BnaA07g08550D,BnaA07g18550D,BnaA07g22210D,BnaA08g18440D,BnaA09g07580D,BnaA09g13680D,BnaA09g13690D,BnaA09g21830D,BnaA09g…
GO:0003674	Molecular Function	GO:0003824	catalytic activity	1524	BnaA01g00360D,BnaA01g01750D,BnaA01g02230D,BnaA01g02440D,BnaA01g02880D,BnaA01g05240D,BnaA01g05340D,BnaA01g06330D,BnaA01g06610D,BnaA01g07100D,BnaA01g08120D,BnaA01g09520D,BnaA01g10530D,BnaA01g11840D,BnaA01g12150D,BnaA01g12400D,BnaA01g13640D,BnaA01g14130D,BnaA01g15080D,BnaA01g15090D,BnaA01g15640D,BnaA01g17540D,BnaA01g17720D,BnaA01g17940D,BnaA01g18530D,BnaA01g19470D,BnaA01g19890D,BnaA01g20890D,BnaA01g…
GO:0003674	Molecular Function	GO:0009055	electron carrier activity	44	BnaA01g16530D,BnaA01g23160D,BnaA01g28110D,BnaA01g36400D,BnaA02g04760D,BnaA03g03680D,BnaA03g07200D,BnaA03g35830D,BnaA03g42050D,BnaA04g00240D,BnaA04g00250D,BnaA04g17610D,BnaA04g29520D,BnaA05g11910D,BnaA07g19500D,BnaA09g40320D,BnaA10g16360D,BnaAnng24030D,BnaAnng26900D,BnaC01g20120D,BnaC01g41930D,BnaC01g41950D,BnaC02g08250D,BnaC03g05180D,BnaC03g09120D,BnaC03g17010D,BnaC03g41680D,BnaC03g51230D,BnaC04g…
GO:0003674	Molecular Function	GO:0005215	transporter activity	209	BnaA01g01000D,BnaA01g03850D,BnaA01g04530D,BnaA01g07100D,BnaA01g12020D,BnaA01g16840D,BnaA01g18410D,BnaA01g25310D,BnaA01g36280D,BnaA02g26600D,BnaA02g26940D,BnaA02g35730D,BnaA02g35930D,BnaA03g05850D,BnaA03g09580D,BnaA03g09920D,BnaA03g24340D,BnaA03g27130D,BnaA03g34620D,BnaA03g34680D,BnaA03g36090D,BnaA03g37130D,BnaA03g39490D,BnaA03g40290D,BnaA03g41510D,BnaA03g49860D,BnaA03g52100D,BnaA03g56990D,BnaA04g…
GO:0003674	Molecular Function	GO:0045735	nutrient reservoir activity	10	BnaA02g04960D,BnaA07g30320D,BnaA09g04150D,BnaAnng02980D,BnaC03g10190D,BnaC03g34440D,BnaC06g33770D,BnaC08g42670D,BnaC09g03550D,BnaC09g37240D
GO:0003674	Molecular Function	GO:0005198	structural molecule activity	97	BnaA01g19850D,BnaA01g26320D,BnaA01g26500D,BnaA01g27320D,BnaA02g07080D,BnaA02g09540D,BnaA02g14440D,BnaA02g28660D,BnaA02g29450D,BnaA03g04820D,BnaA03g06760D,BnaA03g09510D,BnaA03g19990D,BnaA03g20240D,BnaA03g26930D,BnaA03g55820D,BnaA04g19830D,BnaA04g23390D,BnaA05g21220D,BnaA06g14250D,BnaA06g18610D,BnaA06g35530D,BnaA06g40740D,BnaA07g20750D,BnaA07g24530D,BnaA07g37340D,BnaA08g03320D,BnaA08g06270D,BnaA08g…
GO:0003674	Molecular Function	GO:0016209	antioxidant activity	32	BnaA02g06590D,BnaA02g16520D,BnaA02g24880D,BnaA03g13340D,BnaA03g31890D,BnaA04g17910D,BnaA05g30680D,BnaA06g35670D,BnaA07g11360D,BnaA07g11370D,BnaA07g19550D,BnaA08g10870D,BnaA08g21730D,BnaA09g09110D,BnaAnng12900D,BnaC01g25860D,BnaC02g22330D,BnaC02g33030D,BnaC03g73430D,BnaC05g15990D,BnaC05g45140D,BnaC05g50770D,BnaC06g18790D,BnaC07g15280D,BnaC07g19810D,BnaC08g19360D,BnaC08g20820D,BnaC08g35130D,BnaC08g…
GO:0003674	Molecular Function	GO:0060089	molecular transducer activity	26	BnaA02g07840D,BnaA02g14880D,BnaA03g19030D,BnaA03g43410D,BnaA04g22430D,BnaA06g05470D,BnaA06g14550D,BnaA06g34070D,BnaA06g34500D,BnaA07g22210D,BnaA10g03230D,BnaAnng08580D,BnaC01g03940D,BnaC01g05710D,BnaC01g07540D,BnaC02g19810D,BnaC03g04760D,BnaC04g56200D,BnaC05g00620D,BnaC05g02300D,BnaC05g36390D,BnaC07g21260D,BnaC07g21830D,BnaC08g15250D,BnaC08g42660D,BnaCnng09690D
GO:0003674	Molecular Function	GO:0016530	metallochaperone activity	1	BnaA08g24700D
GO:0003674	Molecular Function	GO:0000988	transcription factor activity, protein binding	21	BnaA01g00360D,BnaA01g00670D,BnaA03g54130D,BnaA05g10900D,BnaA06g09160D,BnaA06g22570D,BnaA06g37740D,BnaA06g39180D,BnaA07g24790D,BnaA09g04990D,BnaC01g01660D,BnaC02g04970D,BnaC03g51080D,BnaC04g12330D,BnaC05g10580D,BnaC05g20130D,BnaC07g30280D,BnaC09g04550D,BnaC09g29430D,BnaC09g40420D,BnaCnng09450D
GO:0003674	Molecular Function	GO:0001071	nucleic acid binding transcription factor activity	133	BnaA01g00050D,BnaA01g00670D,BnaA01g01120D,BnaA01g01830D,BnaA01g02570D,BnaA01g08610D,BnaA01g19880D,BnaA01g30920D,BnaA01g31080D,BnaA01g34550D,BnaA01g34730D,BnaA01g34790D,BnaA01g37390D,BnaA02g00310D,BnaA02g17180D,BnaA02g17810D,BnaA02g27680D,BnaA02g31030D,BnaA02g35960D,BnaA03g04920D,BnaA03g05670D,BnaA03g17580D,BnaA03g18190D,BnaA03g21570D,BnaA03g30130D,BnaA03g34290D,BnaA03g43770D,BnaA03g43820D,BnaA03g…
GO:0003674	Molecular Function	GO:0005488	binding	1582	BnaA01g00050D,BnaA01g00360D,BnaA01g00670D,BnaA01g00730D,BnaA01g00790D,BnaA01g01120D,BnaA01g01750D,BnaA01g01830D,BnaA01g01860D,BnaA01g02150D,BnaA01g02230D,BnaA01g02440D,BnaA01g03580D,BnaA01g04370D,BnaA01g05240D,BnaA01g05340D,BnaA01g06610D,BnaA01g07100D,BnaA01g08610D,BnaA01g09520D,BnaA01g10530D,BnaA01g12020D,BnaA01g12400D,BnaA01g13640D,BnaA01g14130D,BnaA01g15080D,BnaA01g15090D,BnaA01g15820D,BnaA01g…
GO:0005575	Cellular Component	GO:0005576	extracellular region	227	BnaA01g08120D,BnaA01g09410D,BnaA01g16530D,BnaA01g16670D,BnaA01g22700D,BnaA01g26320D,BnaA01g29470D,BnaA01g31470D,BnaA01g31480D,BnaA01g32580D,BnaA02g02030D,BnaA02g02290D,BnaA02g02560D,BnaA02g04960D,BnaA02g05240D,BnaA02g07920D,BnaA02g20630D,BnaA02g24170D,BnaA02g24880D,BnaA02g26670D,BnaA02g29640D,BnaA02g30620D,BnaA03g02030D,BnaA03g08850D,BnaA03g09930D,BnaA03g21590D,BnaA03g26140D,BnaA03g30180D,BnaA03g…
GO:0005575	Cellular Component	GO:0031012	extracellular matrix	17	BnaA01g16670D,BnaA01g31470D,BnaA02g04960D,BnaA05g33680D,BnaA07g23960D,BnaA10g01280D,BnaC01g20450D,BnaC03g06470D,BnaC03g10190D,BnaC03g74330D,BnaC05g01340D,BnaC06g24850D,BnaC08g21380D,BnaC08g40250D,BnaC09g37240D,BnaC09g43110D,BnaCnng74460D
GO:0005575	Cellular Component	GO:0009295	nucleoid	12	BnaA05g30680D,BnaA06g19390D,BnaA08g23990D,BnaA09g34010D,BnaAnng12330D,BnaC01g22760D,BnaC03g17810D,BnaC03g63720D,BnaC05g32920D,BnaC05g45140D,BnaC08g24930D,BnaC09g02460D
GO:0005575	Cellular Component	GO:0055044	symplast	93	BnaA01g12020D,BnaA01g16450D,BnaA01g17720D,BnaA01g26500D,BnaA02g12880D,BnaA02g14440D,BnaA02g21030D,BnaA03g08560D,BnaA03g23580D,BnaA03g26140D,BnaA03g43790D,BnaA04g00710D,BnaA04g03610D,BnaA04g05790D,BnaA04g17910D,BnaA04g22150D,BnaA05g07400D,BnaA05g25660D,BnaA05g33380D,BnaA06g12810D,BnaA07g00550D,BnaA07g04970D,BnaA07g08550D,BnaA07g12700D,BnaA07g20750D,BnaA07g30980D,BnaA07g34420D,BnaA08g14100D,BnaA08g…
GO:0005575	Cellular Component	GO:0030054	cell junction	93	BnaA01g12020D,BnaA01g16450D,BnaA01g17720D,BnaA01g26500D,BnaA02g12880D,BnaA02g14440D,BnaA02g21030D,BnaA03g08560D,BnaA03g23580D,BnaA03g26140D,BnaA03g43790D,BnaA04g00710D,BnaA04g03610D,BnaA04g05790D,BnaA04g17910D,BnaA04g22150D,BnaA05g07400D,BnaA05g25660D,BnaA05g33380D,BnaA06g12810D,BnaA07g00550D,BnaA07g04970D,BnaA07g08550D,BnaA07g12700D,BnaA07g20750D,BnaA07g30980D,BnaA07g34420D,BnaA08g14100D,BnaA08g…
GO:0005575	Cellular Component	GO:0099512	supramolecular fiber	32	BnaA01g05240D,BnaA01g13640D,BnaA03g19320D,BnaA03g28700D,BnaA04g22150D,BnaA05g22150D,BnaA05g23190D,BnaA06g28420D,BnaA07g11960D,BnaA07g12700D,BnaA07g20980D,BnaA07g29000D,BnaA08g09560D,BnaA09g05950D,BnaA09g31730D,BnaA09g45430D,BnaAnng10520D,BnaC01g27630D,BnaC03g33810D,BnaC03g63960D,BnaC03g66890D,BnaC03g70260D,BnaC04g33010D,BnaC04g51910D,BnaC05g26970D,BnaC06g18160D,BnaC07g28380D,BnaC08g22570D,BnaC08g…
GO:0005575	Cellular Component	GO:0044421	extracellular region part	18	BnaA01g09410D,BnaA01g16670D,BnaA01g31470D,BnaA08g08890D,BnaA09g15440D,BnaA09g37510D,BnaA10g01280D,BnaAnng09190D,BnaAnng11370D,BnaC01g11000D,BnaC01g20450D,BnaC02g31900D,BnaC03g24290D,BnaC03g62750D,BnaC03g74330D,BnaC05g01340D,BnaC07g18740D,BnaC09g52000D
GO:0005575	Cellular Component	GO:0005623	cell	1538	BnaA01g00050D,BnaA01g00360D,BnaA01g00670D,BnaA01g00790D,BnaA01g01120D,BnaA01g01750D,BnaA01g01830D,BnaA01g01860D,BnaA01g02150D,BnaA01g02440D,BnaA01g04530D,BnaA01g05040D,BnaA01g05240D,BnaA01g06610D,BnaA01g07550D,BnaA01g08610D,BnaA01g09520D,BnaA01g11840D,BnaA01g12020D,BnaA01g12150D,BnaA01g12400D,BnaA01g13640D,BnaA01g15090D,BnaA01g15640D,BnaA01g16450D,BnaA01g16530D,BnaA01g16830D,BnaA01g16840D,BnaA01g…
GO:0005575	Cellular Component	GO:0044464	cell part	1507	BnaA01g00050D,BnaA01g00360D,BnaA01g00670D,BnaA01g00790D,BnaA01g01120D,BnaA01g01750D,BnaA01g01830D,BnaA01g01860D,BnaA01g02150D,BnaA01g02440D,BnaA01g04530D,BnaA01g05040D,BnaA01g05240D,BnaA01g06610D,BnaA01g07550D,BnaA01g08610D,BnaA01g09520D,BnaA01g12020D,BnaA01g12150D,BnaA01g12400D,BnaA01g13640D,BnaA01g15090D,BnaA01g15640D,BnaA01g16450D,BnaA01g16530D,BnaA01g16830D,BnaA01g16840D,BnaA01g17030D,BnaA01g…
GO:0005575	Cellular Component	GO:0019012	virion	2	BnaA07g35510D,BnaC02g23030D
GO:0005575	Cellular Component	GO:0044423	virion part	2	BnaA07g35510D,BnaC02g23030D
GO:0005575	Cellular Component	GO:0016020	membrane	1238	BnaA01g01000D,BnaA01g02600D,BnaA01g03850D,BnaA01g04530D,BnaA01g05040D,BnaA01g05340D,BnaA01g06610D,BnaA01g07100D,BnaA01g08360D,BnaA01g09410D,BnaA01g09520D,BnaA01g10460D,BnaA01g11140D,BnaA01g12020D,BnaA01g12150D,BnaA01g12400D,BnaA01g15090D,BnaA01g16450D,BnaA01g16530D,BnaA01g16670D,BnaA01g16830D,BnaA01g16840D,BnaA01g17030D,BnaA01g17540D,BnaA01g18130D,BnaA01g18410D,BnaA01g19470D,BnaA01g21600D,BnaA01g…
GO:0005575	Cellular Component	GO:0043226	organelle	1055	BnaA01g00050D,BnaA01g00360D,BnaA01g00670D,BnaA01g00790D,BnaA01g01120D,BnaA01g01750D,BnaA01g01830D,BnaA01g01860D,BnaA01g02150D,BnaA01g02440D,BnaA01g05040D,BnaA01g05240D,BnaA01g06610D,BnaA01g08610D,BnaA01g12020D,BnaA01g12150D,BnaA01g13640D,BnaA01g15640D,BnaA01g16450D,BnaA01g16530D,BnaA01g16830D,BnaA01g17540D,BnaA01g18530D,BnaA01g19850D,BnaA01g19860D,BnaA01g19880D,BnaA01g19890D,BnaA01g23160D,BnaA01g…
GO:0005575	Cellular Component	GO:0044425	membrane part	1008	BnaA01g01000D,BnaA01g02600D,BnaA01g03850D,BnaA01g04530D,BnaA01g05340D,BnaA01g06610D,BnaA01g07100D,BnaA01g09410D,BnaA01g09520D,BnaA01g10460D,BnaA01g11140D,BnaA01g12020D,BnaA01g12150D,BnaA01g12400D,BnaA01g16530D,BnaA01g16670D,BnaA01g16840D,BnaA01g17030D,BnaA01g18130D,BnaA01g18410D,BnaA01g19470D,BnaA01g21600D,BnaA01g21610D,BnaA01g21750D,BnaA01g24440D,BnaA01g24840D,BnaA01g25310D,BnaA01g25640D,BnaA01g…
GO:0005575	Cellular Component	GO:0044422	organelle part	404	BnaA01g01750D,BnaA01g02440D,BnaA01g05240D,BnaA01g06610D,BnaA01g12020D,BnaA01g12150D,BnaA01g13640D,BnaA01g16830D,BnaA01g17540D,BnaA01g19850D,BnaA01g19860D,BnaA01g23160D,BnaA01g24440D,BnaA01g26500D,BnaA01g28110D,BnaA01g34810D,BnaA01g35130D,BnaA02g02290D,BnaA02g07080D,BnaA02g12880D,BnaA02g20630D,BnaA02g29650D,BnaA02g30460D,BnaA03g02480D,BnaA03g03180D,BnaA03g05850D,BnaA03g06160D,BnaA03g09510D,BnaA03g…
GO:0005575	Cellular Component	GO:0032991	macromolecular complex	238	BnaA01g01750D,BnaA01g13640D,BnaA01g19860D,BnaA01g27320D,BnaA01g28110D,BnaA01g28200D,BnaA01g35130D,BnaA02g09540D,BnaA02g14440D,BnaA02g18230D,BnaA02g28660D,BnaA02g29450D,BnaA02g30460D,BnaA02g33340D,BnaA02g34030D,BnaA03g03180D,BnaA03g04820D,BnaA03g06160D,BnaA03g06760D,BnaA03g07610D,BnaA03g19990D,BnaA03g20240D,BnaA03g22970D,BnaA03g24380D,BnaA03g26930D,BnaA03g52400D,BnaA03g55820D,BnaA04g05490D,BnaA04g…
GO:0005575	Cellular Component	GO:0031974	membrane-enclosed lumen	57	BnaA01g01750D,BnaA01g19860D,BnaA01g35130D,BnaA02g12880D,BnaA03g06160D,BnaA03g37560D,BnaA05g10480D,BnaA06g28390D,BnaA06g37780D,BnaA07g00340D,BnaA07g15170D,BnaA07g24790D,BnaA08g00430D,BnaA08g03320D,BnaA08g11650D,BnaA08g19980D,BnaA08g31360D,BnaA09g29310D,BnaA09g46680D,BnaA09g50980D,BnaA09g55240D,BnaA10g00800D,BnaC01g02870D,BnaC01g22760D,BnaC01g40380D,BnaC01g41540D,BnaC03g37960D,BnaC03g66890D,BnaC03g…
